# Supplementary material for: Parent-of-Origin inference for biobanks
Source: PubMed Central journal article supplement (PMC9637181; doi:10.1038/s41467-022-34383-6), 2022-11-05
Supplement: 41467_2022_34383_MOESM3_ESM.pdf [file 41467_2022_34383_MOESM3_ESM.pdf]

## Description of Additional Supplementary Files

**Supplementary Data submitted in one Excel file called “Supplementary Data 1-3” with 3 tabs:**

**Supplementary Data 1.** Distribution of the phenotypes tested in this study across all individuals, or stratified by sex. N=number of samples; Mean=mean; sd= standard deviation; min=minimum; max=maximum.

**Supplementary Data 2.** Phenome-wide association study across the four reported type-2-diabetes variants. P-values (in our study) are computed using BOLT-MM<sup>18</sup>. Add=Additive ; Pat.=Paternal ; Mat.=Maternal ; Diff.=Differential ; P=p-values; B=betas.

**Supplementary Data 3.** Replication of PofO associations with birth weight reported by Juliusdottir et al<sup>41</sup> . P-values (in our study) are computed using BOLT-MM<sup>18</sup>. Add=Additive ; Pat.=Paternal ; Mat.=Maternal ; Diff.=Differential ; P=p-values; B=betas.
